# Supplementary material
Source: publisher figshare collection journal article supplement (https://acs.figshare.com/ndownloader/files/5342350)
Supplement: Supplementary file 1 [file 5342350]

data_General
_audit_creation_date                  '2007-10-23'
_audit_creation_method                'by CrystalStructure 3.8'
_audit_update_record                   ?

#==============================================================================

# PROCESSING SUMMARY (IUCr Office Use Only)

_journal_date_recd_electronic     ?
_journal_date_from_coeditor       ?
_journal_date_accepted            ?
_journal_coeditor_code            ?

#==============================================================================

# SUBMISSION DETAILS

_publ_contact_author_name             'ENTER NAME'
_publ_contact_author_email            'ENTER EMAIL ADDRESS'
_publ_contact_author_fax              'ENTER FAX NUMBER'
_publ_contact_author_phone            'ENTER PHONE NUMBER'
_publ_contact_letter
;
    ENTER TEXT OF LETTER
;
_publ_requested_journal               'ENTER JOURNAL NAME HERE'
_publ_requested_category              'CHOOSE FI FM FO CI CM CO or AD'
_publ_requested_coeditor_name          ?

#==============================================================================

# TITLE AND AUTHOR LIST

_publ_section_title
;
    ENTER SECTION TITLE
;
_publ_section_title_footnote
;
    ENTER FOOTNOTE TO TITLE OF PAPER
;
loop_
_publ_author_name
_publ_author_footnote
_publ_author_address
' FIRST AUTHORS NAME '
;
  FIRST AUTHORS FOOTNOTES
;
;
  FIRST AUTHORS ADDRESS
;
_publ_section_synopsis
;
  ENTER SYNOPSIS
;

#==============================================================================

# TEXT

_publ_section_abstract
;
    ENTER ABSTRACT
;
_publ_section_comment
;
    ENTER TEXT
;
_publ_section_references
;
    ENTER OTHER REFERENCES

    Rigaku Americas and Rigaku Corporation. (2007).
    CrystalStructure (Version 3.8). 
    Single Crystal Structure Analysis Software.
    Rigaku Americas, 9009 TX, USA 77381-5209.
    Rigaku, Tokyo 196-8666, Japan.

    Altomare, A., Burla, M., Camalli, M., Cascarano, G., 
    Giacovazzo, C., Guagliardi, A., Moliterni, A., Polidori, 
    G., and Spagna, R. (1999). J. Appl. Cryst., 32, 115-119. 
    SIR97

    Carruthers, J.R., Rollett,J.S., Betteridge, P.W.,
	 Kinna, D., Pearce, L., Larsen, A., and Gabe, E.(1999)
    CRYSTALS Issue 11, Chemical Crystallography Laboratory, Oxford, UK.

;
_publ_section_figure_captions
;
    ENTER FIGURE CAPTIONS
;
_publ_section_exptl_prep
;
    ENTER COMPOUND PREPARATION DETAILS
;
_publ_section_exptl_refinement
;
    ENTER SPECIAL DETAILS OF THE REFINEMENT
;

#==============================================================================

data__anti-C8H12O2

#==============================================================================

# CHEMICAL DATA

_chemical_formula_sum                  'C8 H12 O2 '
_chemical_formula_moiety               'C8 H12 O2 '
_chemical_formula_weight               140.18
_chemical_melting_point                ?

#==============================================================================

# CRYSTAL DATA
_symmetry_cell_setting                 triclinic
_symmetry_space_group_name_H-M        'P -1'
_symmetry_space_group_name_Hall       '-P 1'
_symmetry_Int_Tables_number            2
loop_
_symmetry_equiv_pos_site_id
_symmetry_equiv_pos_as_xyz
1   '+X,+Y,+Z'
2   '-X,-Y,-Z'

#------------------------------------------------------------------------------

_cell_length_a                         10.5911(12)
_cell_length_b                         11.7900(15)
_cell_length_c                         12.2848(14)
_cell_angle_alpha                      66.034(3)
_cell_angle_beta                       62.980(2)
_cell_angle_gamma                      67.991(3)
_cell_volume                           1214.2(2)
_cell_formula_units_Z                  6
_cell_measurement_reflns_used          4867
_cell_measurement_theta_min            3.1
_cell_measurement_theta_max            27.5
_cell_measurement_temperature          296.1

#------------------------------------------------------------------------------

_exptl_crystal_description            'plate'
_exptl_crystal_colour                 'colorless'
_exptl_crystal_size_max                0.75
_exptl_crystal_size_mid                0.55
_exptl_crystal_size_min                0.20
_exptl_crystal_density_diffrn          1.150
_exptl_crystal_density_meas            ?
_exptl_crystal_density_method         'not measured'
_exptl_crystal_F_000                   456.00
_exptl_absorpt_coefficient_mu          0.081
_exptl_absorpt_correction_type         none

#==============================================================================

# EXPERIMENTAL DATA

_diffrn_radiation_type                'Mo K\a'
_diffrn_radiation_wavelength           0.71075
_diffrn_measurement_device_type       'Rigaku RAXIS-RAPID'
_diffrn_measurement_method             \w
_diffrn_detector_area_resol_mean       10.00
_diffrn_reflns_number                  12075
_diffrn_reflns_av_R_equivalents        0.038
_diffrn_reflns_theta_max               27.47
_diffrn_measured_fraction_theta_max    0.996
_diffrn_reflns_theta_full              27.47
_diffrn_measured_fraction_theta_full   0.996
_diffrn_reflns_limit_h_min             -13
_diffrn_reflns_limit_h_max             13
_diffrn_reflns_limit_k_min             -15
_diffrn_reflns_limit_k_max             15
_diffrn_reflns_limit_l_min             -15
_diffrn_reflns_limit_l_max             14

#==============================================================================

# REFINEMENT DATA

_refine_special_details
;
    Refinement was performed using all reflections. The weighted 
    R-factor (wR) and goodness of fit (S) are based on F^2^.
    R-factor (gt) are based on F. The threshold expression of
    F^2^ > 2.0 sigma(F^2^) is used only for calculating R-factor (gt).
;
_reflns_number_total                   5536
_reflns_number_gt                      6323
_reflns_threshold_expression           F^2^>2.0\s(F^2^)
_refine_ls_structure_factor_coef       Fsqd
_refine_ls_R_factor_gt                 0.0637
_refine_ls_wR_factor_ref               0.1358
_refine_ls_hydrogen_treatment          refall
_refine_ls_number_reflns               12075
_refine_ls_number_parameters           307
_refine_ls_goodness_of_fit_ref         1.000
_refine_ls_weighting_scheme            calc
_refine_ls_weighting_details
'w = 1/[3.4650\s(Fo^2^)]/(4Fo^2^)'
_refine_ls_shift/su_max                0.0000
_refine_diff_density_max               1.20
_refine_diff_density_min               -0.88
_refine_ls_extinction_method           none
_refine_ls_extinction_coef             ?

loop_
_atom_type_symbol
_atom_type_description
_atom_type_scat_dispersion_real
_atom_type_scat_dispersion_imag
_atom_type_scat_source
  'C' 'C'  0.003 0.002 
;
International Tables for Crystallography
(1992, Vol. C, Tables 4.2.6.8 and 6.1.1.4)
;
  'H' 'H'  0.000 0.000 
;
International Tables for Crystallography
(1992, Vol. C, Table 6.1.1.4)
;
  'O' 'O'  0.011 0.006 
;
International Tables for Crystallography
(1992, Vol. C, Tables 4.2.6.8 and 6.1.1.4)
;

#==============================================================================

# ATOMIC COORDINATES AND THERMAL PARAMETERS

loop_
_atom_site_label
_atom_site_type_symbol
_atom_site_fract_x
_atom_site_fract_y
_atom_site_fract_z
_atom_site_U_iso_or_equiv
_atom_site_adp_type
_atom_site_occupancy
_atom_site_symmetry_multiplicity
_atom_site_calc_flag
_atom_site_refinement_flags
_atom_site_disorder_assembly
_atom_site_disorder_group
 O(1) O 0.08956(10) 0.52478(11) 0.31501(10) 0.0568(3) Uani 1.00 1 d . . .
 O(2) O -0.11107(10) 0.40315(12) 0.33499(11) 0.0669(4) Uani 1.00 1 d . . .
 O(3) O 0.71102(10) 0.66448(12) 0.13625(10) 0.0614(3) Uani 1.00 1 d . . .
 O(4) O 0.61815(10) 0.54513(11) 0.40968(10) 0.0622(3) Uani 1.00 1 d . . .
 O(5) O 1.02362(10) 0.31920(12) -0.11820(9) 0.0598(3) Uani 1.00 1 d . . .
 O(6) O 0.90269(12) 0.41872(13) 0.10000(11) 0.0758(4) Uani 1.00 1 d . . .
 C(1) C 0.26302(18) 0.3112(2) 0.14291(18) 0.0753(7) Uani 1.00 1 d . . .
 C(2) C 0.20090(15) 0.34451(17) 0.23510(16) 0.0500(5) Uani 1.00 1 d . . .
 C(3) C 0.11509(14) 0.38891(17) 0.34962(15) 0.0453(5) Uani 1.00 1 d . . .
 C(4) C -0.02888(15) 0.34843(17) 0.41798(16) 0.0529(5) Uani 1.00 1 d . . .
 C(5) C -0.00634(17) 0.20419(19) 0.47088(18) 0.0707(6) Uani 1.00 1 d . . .
 C(6) C 0.0792(2) 0.1498(2) 0.55881(18) 0.0835(7) Uani 1.00 1 d . . .
 C(7) C 0.22145(18) 0.19095(19) 0.49409(18) 0.0714(6) Uani 1.00 1 d . . .
 C(8) C 0.19721(17) 0.33399(18) 0.44217(16) 0.0602(6) Uani 1.00 1 d . . .
 C(9) C 0.3620(2) 0.6330(2) 0.25584(18) 0.0820(7) Uani 1.00 1 d . . .
 C(10) C 0.45812(17) 0.67007(19) 0.24247(16) 0.0592(6) Uani 1.00 1 d . . .
 C(11) C 0.57812(14) 0.71691(16) 0.22622(15) 0.0466(5) Uani 1.00 1 d . . .
 C(12) C 0.59639(14) 0.67890(16) 0.35365(14) 0.0454(4) Uani 1.00 1 d . . .
 C(13) C 0.46877(16) 0.74564(18) 0.44637(16) 0.0615(6) Uani 1.00 1 d . . .
 C(14) C 0.4396(2) 0.8893(2) 0.3890(2) 0.0874(8) Uani 1.00 1 d . . .
 C(15) C 0.42019(18) 0.9292(2) 0.2627(2) 0.0852(7) Uani 1.00 1 d . . .
 C(16) C 0.55088(18) 0.86078(18) 0.17090(17) 0.0699(6) Uani 1.00 1 d . . .
 C(17) C 1.0954(2) 0.0853(2) 0.1353(2) 0.0953(8) Uani 1.00 1 d . . .
 C(18) C 1.02206(19) 0.1617(2) 0.08166(18) 0.0673(6) Uani 1.00 1 d . . .
 C(19) C 0.93225(17) 0.25868(19) 0.00645(16) 0.0575(5) Uani 1.00 1 d . . .
 C(20) C 0.83039(17) 0.3573(2) 0.07547(17) 0.0658(6) Uani 1.00 1 d . . .
 C(21) C 0.71881(18) 0.3007(2) 0.20090(18) 0.0842(7) Uani 1.00 1 d . . .
 C(22) C 0.6333(2) 0.2377(2) 0.1793(2) 0.1198(11) Uani 1.00 1 d . . .
 C(23) C 0.7311(2) 0.1414(2) 0.1090(2) 0.1047(10) Uani 1.00 1 d . . .
 C(24) C 0.84491(18) 0.1978(2) -0.01576(17) 0.0718(7) Uani 1.00 1 d . . .
 H(1) H 0.0341 0.5644 0.2516 0.074 Uiso 1.00 1 c R . .
 H(2) H -0.0775 0.3289 0.3194 0.085 Uiso 1.00 1 c R . .
 H(3) H 0.3136 0.2840 0.0678 0.090 Uiso 1.00 1 c R . .
 H(4) H -0.0832 0.3830 0.4883 0.064 Uiso 1.00 1 c R . .
 H(5) H -0.0988 0.1834 0.5171 0.085 Uiso 1.00 1 c R . .
 H(6) H 0.0455 0.1675 0.4020 0.085 Uiso 1.00 1 c R . .
 H(7) H 0.0226 0.1789 0.6325 0.100 Uiso 1.00 1 c R . .
 H(8) H 0.0992 0.0593 0.5832 0.100 Uiso 1.00 1 c R . .
 H(9) H 0.2679 0.1619 0.5542 0.086 Uiso 1.00 1 c R . .
 H(10) H 0.2823 0.1541 0.4259 0.086 Uiso 1.00 1 c R . .
 H(11) H 0.2892 0.3557 0.3985 0.072 Uiso 1.00 1 c R . .
 H(12) H 0.1421 0.3703 0.5113 0.072 Uiso 1.00 1 c R . .
 H(13) H 0.7219 0.5604 0.1905 0.074 Uiso 1.00 1 c R . .
 H(14) H 0.7253 0.4947 0.3825 0.070 Uiso 1.00 1 c R . .
 H(15) H 0.2842 0.6030 0.2667 0.098 Uiso 1.00 1 c R . .
 H(16) H 0.6809 0.7027 0.3377 0.054 Uiso 1.00 1 c R . .
 H(17) H 0.3845 0.7180 0.4684 0.074 Uiso 1.00 1 c R . .
 H(18) H 0.4895 0.7242 0.5209 0.074 Uiso 1.00 1 c R . .
 H(19) H 0.3535 0.9277 0.4466 0.105 Uiso 1.00 1 c R . .
 H(20) H 0.5196 0.9180 0.3757 0.105 Uiso 1.00 1 c R . .
 H(21) H 0.3346 0.9083 0.2768 0.102 Uiso 1.00 1 c R . .
 H(22) H 0.4107 1.0187 0.2263 0.102 Uiso 1.00 1 c R . .
 H(23) H 0.6350 0.8868 0.1523 0.084 Uiso 1.00 1 c R . .
 H(24) H 0.5334 0.8839 0.0945 0.084 Uiso 1.00 1 c R . .
 H(25) H 1.1264 0.3170 -0.1152 0.074 Uiso 1.00 1 c R . .
 H(26) H 0.9725 0.4548 0.0398 0.099 Uiso 1.00 1 c R . .
 H(27) H 1.1564 0.0218 0.1799 0.114 Uiso 1.00 1 c R . .
 H(28) H 0.7786 0.4208 0.0228 0.079 Uiso 1.00 1 c R . .
 H(29) H 0.7679 0.2387 0.2564 0.101 Uiso 1.00 1 c R . .
 H(30) H 0.6531 0.3669 0.2388 0.101 Uiso 1.00 1 c R . .
 H(31) H 0.5711 0.1968 0.2597 0.144 Uiso 1.00 1 c R . .
 H(32) H 0.5761 0.3017 0.1314 0.144 Uiso 1.00 1 c R . .
 H(33) H 0.7797 0.0724 0.1612 0.126 Uiso 1.00 1 c R . .
 H(34) H 0.6739 0.1112 0.0902 0.126 Uiso 1.00 1 c R . .
 H(35) H 0.7968 0.2609 -0.0716 0.086 Uiso 1.00 1 c R . .
 H(36) H 0.9099 0.1316 -0.0538 0.086 Uiso 1.00 1 c R . .


loop_
_atom_site_aniso_label
_atom_site_aniso_U_11
_atom_site_aniso_U_22
_atom_site_aniso_U_33
_atom_site_aniso_U_12
_atom_site_aniso_U_13
_atom_site_aniso_U_23
 O(1) 0.0689(6) 0.0461(8) 0.0670(8) -0.0120(5) -0.0331(5) -0.0178(6)
 O(2) 0.0485(6) 0.0769(10) 0.0813(8) -0.0059(5) -0.0279(5) -0.0305(7)
 O(3) 0.0619(6) 0.0727(10) 0.0451(6) -0.0283(6) -0.0023(5) -0.0204(6)
 O(4) 0.0541(6) 0.0462(8) 0.0651(7) 0.0003(5) -0.0208(5) -0.0074(6)
 O(5) 0.0598(6) 0.0740(9) 0.0451(7) -0.0285(6) -0.0138(5) -0.0104(6)
 O(6) 0.0847(8) 0.0876(11) 0.0707(8) -0.0456(7) -0.0098(6) -0.0345(8)
 C(1) 0.0771(12) 0.0825(17) 0.0583(13) -0.0022(10) -0.0200(10) -0.0324(12)
 C(2) 0.0445(8) 0.0568(12) 0.0484(11) -0.0079(7) -0.0164(7) -0.0185(9)
 C(3) 0.0468(8) 0.0437(11) 0.0502(10) -0.0072(7) -0.0197(7) -0.0182(8)
 C(4) 0.0453(8) 0.0566(13) 0.0537(10) -0.0050(7) -0.0158(7) -0.0211(9)
 C(5) 0.0585(10) 0.0606(15) 0.0827(14) -0.0211(9) -0.0160(9) -0.0149(11)
 C(6) 0.0967(14) 0.0611(16) 0.0697(14) -0.0105(11) -0.0295(11) -0.0048(11)
 C(7) 0.0799(12) 0.0647(15) 0.0750(13) -0.0023(10) -0.0448(10) -0.0185(11)
 C(8) 0.0675(10) 0.0597(14) 0.0659(12) -0.0049(8) -0.0367(9) -0.0237(10)
 C(9) 0.0847(13) 0.0980(19) 0.0842(15) -0.0404(12) -0.0441(11) -0.0122(13)
 C(10) 0.0625(10) 0.0666(14) 0.0600(11) -0.0226(9) -0.0309(8) -0.0114(10)
 C(11) 0.0469(8) 0.0475(12) 0.0428(9) -0.0181(7) -0.0148(7) -0.0055(8)
 C(12) 0.0379(7) 0.0486(12) 0.0481(9) -0.0092(6) -0.0131(7) -0.0157(8)
 C(13) 0.0577(9) 0.0643(14) 0.0587(11) -0.0049(8) -0.0152(8) -0.0287(10)
 C(14) 0.0780(13) 0.0665(17) 0.1096(18) -0.0008(11) -0.0226(12) -0.0445(14)
 C(15) 0.0733(12) 0.0447(14) 0.1173(18) -0.0034(9) -0.0374(12) -0.0098(13)
 C(16) 0.0756(11) 0.0573(14) 0.0708(13) -0.0259(9) -0.0332(10) 0.0048(11)
 C(17) 0.0867(14) 0.098(2) 0.0861(16) -0.0262(13) -0.0416(12) 0.0045(14)
 C(18) 0.0672(11) 0.0673(15) 0.0641(12) -0.0259(10) -0.0288(9) -0.0003(10)
 C(19) 0.0595(10) 0.0619(13) 0.0548(11) -0.0305(9) -0.0109(8) -0.0161(10)
 C(20) 0.0625(10) 0.0737(15) 0.0622(12) -0.0299(10) -0.0072(8) -0.0251(11)
 C(21) 0.0670(11) 0.0992(19) 0.0755(14) -0.0365(12) 0.0051(9) -0.0341(13)
 C(22) 0.0772(15) 0.150(2) 0.131(2) -0.0660(16) 0.0018(14) -0.048(2)
 C(23) 0.0963(15) 0.105(2) 0.128(2) -0.0664(15) -0.0178(14) -0.0334(18)
 C(24) 0.0822(12) 0.0750(16) 0.0757(13) -0.0372(11) -0.0313(10) -0.0172(11)

#==============================================================================

_computing_data_collection            'PROCESS-AUTO'
_computing_cell_refinement            'PROCESS-AUTO'
_computing_data_reduction             'CrystalStructure'
_computing_structure_solution         'SIR97'
_computing_structure_refinement       'CRYSTALS'
_computing_publication_material       'CrystalStructure 3.8'
_computing_molecular_graphics          ?

#==============================================================================

# MOLECULAR GEOMETRY

_geom_special_details
;
    ENTER SPECIAL DETAILS OF THE MOLECULAR GEOMETRY
;

loop_
_geom_bond_atom_site_label_1
_geom_bond_atom_site_label_2
_geom_bond_distance
_geom_bond_publ_flag
_geom_bond_site_symmetry_1
_geom_bond_site_symmetry_2
O(1) C(3) 1.431(2) yes . .
O(2) C(4) 1.437(2) yes . .
O(3) C(11) 1.4402(16) yes . .
O(4) C(12) 1.4157(19) yes . .
O(5) C(19) 1.4401(16) yes . .
O(6) C(20) 1.416(3) yes . .
C(1) C(2) 1.167(2) yes . .
C(2) C(3) 1.469(2) yes . .
C(3) C(4) 1.521(2) yes . .
C(3) C(8) 1.532(2) yes . .
C(4) C(5) 1.520(2) yes . .
C(5) C(6) 1.513(3) yes . .
C(6) C(7) 1.511(2) yes . .
C(7) C(8) 1.506(2) yes . .
C(9) C(10) 1.173(3) yes . .
C(10) C(11) 1.472(3) yes . .
C(11) C(12) 1.526(2) yes . .
C(11) C(16) 1.516(2) yes . .
C(12) C(13) 1.509(2) yes . .
C(13) C(14) 1.516(2) yes . .
C(14) C(15) 1.515(3) yes . .
C(15) C(16) 1.524(2) yes . .
C(17) C(18) 1.144(2) yes . .
C(18) C(19) 1.480(2) yes . .
C(19) C(20) 1.504(2) yes . .
C(19) C(24) 1.527(3) yes . .
C(20) C(21) 1.522(2) yes . .
C(21) C(22) 1.525(4) yes . .
C(22) C(23) 1.487(4) yes . .
C(23) C(24) 1.529(2) yes . .
O(1) H(1) 1.042 no . .
O(2) H(2) 0.877 no . .
O(3) H(13) 1.124 no . .
O(4) H(14) 1.032 no . .
O(5) H(25) 1.097 no . .
O(6) H(26) 0.870 no . .
C(1) H(3) 0.950 no . .
C(4) H(4) 0.950 no . .
C(5) H(5) 0.950 no . .
C(5) H(6) 0.950 no . .
C(6) H(7) 0.950 no . .
C(6) H(8) 0.950 no . .
C(7) H(9) 0.950 no . .
C(7) H(10) 0.950 no . .
C(8) H(11) 0.950 no . .
C(8) H(12) 0.950 no . .
C(9) H(15) 0.950 no . .
C(12) H(16) 0.950 no . .
C(13) H(17) 0.950 no . .
C(13) H(18) 0.950 no . .
C(14) H(19) 0.950 no . .
C(14) H(20) 0.950 no . .
C(15) H(21) 0.950 no . .
C(15) H(22) 0.950 no . .
C(16) H(23) 0.950 no . .
C(16) H(24) 0.950 no . .
C(17) H(27) 0.950 no . .
C(20) H(28) 0.950 no . .
C(21) H(29) 0.950 no . .
C(21) H(30) 0.950 no . .
C(22) H(31) 0.950 no . .
C(22) H(32) 0.950 no . .
C(23) H(33) 0.950 no . .
C(23) H(34) 0.950 no . .
C(24) H(35) 0.950 no . .
C(24) H(36) 0.950 no . .

loop_
_geom_angle_atom_site_label_1
_geom_angle_atom_site_label_2
_geom_angle_atom_site_label_3
_geom_angle
_geom_angle_publ_flag
_geom_angle_site_symmetry_1
_geom_angle_site_symmetry_2
_geom_angle_site_symmetry_3
C(1) C(2) C(3) 176.8(2) yes . . .
O(1) C(3) C(2) 109.89(12) yes . . .
O(1) C(3) C(4) 110.33(11) yes . . .
O(1) C(3) C(8) 106.55(18) yes . . .
C(2) C(3) C(4) 110.02(19) yes . . .
C(2) C(3) C(8) 111.35(12) yes . . .
C(4) C(3) C(8) 108.64(12) yes . . .
O(2) C(4) C(3) 109.85(12) yes . . .
O(2) C(4) C(5) 112.85(19) yes . . .
C(3) C(4) C(5) 111.76(12) yes . . .
C(4) C(5) C(6) 111.5(2) yes . . .
C(5) C(6) C(7) 111.27(14) yes . . .
C(6) C(7) C(8) 111.39(14) yes . . .
C(3) C(8) C(7) 112.1(2) yes . . .
C(9) C(10) C(11) 179.69(19) yes . . .
O(3) C(11) C(10) 109.32(17) yes . . .
O(3) C(11) C(12) 109.95(11) yes . . .
O(3) C(11) C(16) 106.57(11) yes . . .
C(10) C(11) C(12) 110.49(12) yes . . .
C(10) C(11) C(16) 110.95(14) yes . . .
C(12) C(11) C(16) 109.47(18) yes . . .
O(4) C(12) C(11) 110.94(17) yes . . .
O(4) C(12) C(13) 109.55(10) yes . . .
C(11) C(12) C(13) 112.60(12) yes . . .
C(12) C(13) C(14) 111.26(13) yes . . .
C(13) C(14) C(15) 111.7(2) yes . . .
C(14) C(15) C(16) 110.65(15) yes . . .
C(11) C(16) C(15) 112.07(13) yes . . .
C(17) C(18) C(19) 177.2(2) yes . . .
O(5) C(19) C(18) 110.52(12) yes . . .
O(5) C(19) C(20) 109.80(15) yes . . .
O(5) C(19) C(24) 106.01(16) yes . . .
C(18) C(19) C(20) 109.39(18) yes . . .
C(18) C(19) C(24) 111.24(18) yes . . .
C(20) C(19) C(24) 109.83(15) yes . . .
O(6) C(20) C(19) 113.55(14) yes . . .
O(6) C(20) C(21) 108.65(19) yes . . .
C(19) C(20) C(21) 111.77(18) yes . . .
C(20) C(21) C(22) 110.9(2) yes . . .
C(21) C(22) C(23) 111.89(19) yes . . .
C(22) C(23) C(24) 111.8(2) yes . . .
C(19) C(24) C(23) 111.6(2) yes . . .
C(3) O(1) H(1) 108.0 no . . .
C(4) O(2) H(2) 86.2 no . . .
C(11) O(3) H(13) 99.3 no . . .
C(12) O(4) H(14) 114.9 no . . .
C(19) O(5) H(25) 110.2 no . . .
C(20) O(6) H(26) 121.9 no . . .
C(2) C(1) H(3) 180.0 no . . .
O(2) C(4) H(4) 107.4 no . . .
C(3) C(4) H(4) 107.4 no . . .
C(5) C(4) H(4) 107.4 no . . .
C(4) C(5) H(5) 109.0 no . . .
C(4) C(5) H(6) 109.0 no . . .
C(6) C(5) H(5) 109.0 no . . .
C(6) C(5) H(6) 109.0 no . . .
H(5) C(5) H(6) 109.5 no . . .
C(5) C(6) H(7) 109.0 no . . .
C(5) C(6) H(8) 109.0 no . . .
C(7) C(6) H(7) 109.0 no . . .
C(7) C(6) H(8) 109.0 no . . .
H(7) C(6) H(8) 109.5 no . . .
C(6) C(7) H(9) 109.0 no . . .
C(6) C(7) H(10) 109.0 no . . .
C(8) C(7) H(9) 109.0 no . . .
C(8) C(7) H(10) 109.0 no . . .
H(9) C(7) H(10) 109.5 no . . .
C(3) C(8) H(11) 108.8 no . . .
C(3) C(8) H(12) 108.8 no . . .
C(7) C(8) H(11) 108.8 no . . .
C(7) C(8) H(12) 108.8 no . . .
H(11) C(8) H(12) 109.5 no . . .
C(10) C(9) H(15) 180.0 no . . .
O(4) C(12) H(16) 107.9 no . . .
C(11) C(12) H(16) 107.9 no . . .
C(13) C(12) H(16) 107.9 no . . .
C(12) C(13) H(17) 109.0 no . . .
C(12) C(13) H(18) 109.0 no . . .
C(14) C(13) H(17) 109.0 no . . .
C(14) C(13) H(18) 109.0 no . . .
H(17) C(13) H(18) 109.5 no . . .
C(13) C(14) H(19) 108.9 no . . .
C(13) C(14) H(20) 108.9 no . . .
C(15) C(14) H(19) 108.9 no . . .
C(15) C(14) H(20) 108.9 no . . .
H(19) C(14) H(20) 109.5 no . . .
C(14) C(15) H(21) 109.2 no . . .
C(14) C(15) H(22) 109.2 no . . .
C(16) C(15) H(21) 109.2 no . . .
C(16) C(15) H(22) 109.2 no . . .
H(21) C(15) H(22) 109.5 no . . .
C(11) C(16) H(23) 108.8 no . . .
C(11) C(16) H(24) 108.8 no . . .
C(15) C(16) H(23) 108.8 no . . .
C(15) C(16) H(24) 108.8 no . . .
H(23) C(16) H(24) 109.5 no . . .
C(18) C(17) H(27) 180.0 no . . .
O(6) C(20) H(28) 107.5 no . . .
C(19) C(20) H(28) 107.5 no . . .
C(21) C(20) H(28) 107.5 no . . .
C(20) C(21) H(29) 109.1 no . . .
C(20) C(21) H(30) 109.1 no . . .
C(22) C(21) H(29) 109.1 no . . .
C(22) C(21) H(30) 109.1 no . . .
H(29) C(21) H(30) 109.5 no . . .
C(21) C(22) H(31) 108.9 no . . .
C(21) C(22) H(32) 108.9 no . . .
C(23) C(22) H(31) 108.9 no . . .
C(23) C(22) H(32) 108.9 no . . .
H(31) C(22) H(32) 109.5 no . . .
C(22) C(23) H(33) 108.9 no . . .
C(22) C(23) H(34) 108.9 no . . .
C(24) C(23) H(33) 108.9 no . . .
C(24) C(23) H(34) 108.9 no . . .
H(33) C(23) H(34) 109.5 no . . .
C(19) C(24) H(35) 108.9 no . . .
C(19) C(24) H(36) 108.9 no . . .
C(23) C(24) H(35) 108.9 no . . .
C(23) C(24) H(36) 108.9 no . . .
H(35) C(24) H(36) 109.5 no . . .


#==============================================================================

# Additional structures and associated data_? identifiers
# should be added at this point if there is more than one 
# structure analysis in the CIF.

#==============================================================================

#     End of CIF

#==============================================================================
